# Supplementary material for: Inhibition of BDNF-AS Provides Neuroprotection for Retinal Ganglion Cells against Ischemic Injury
Source: PLoS One. 2016 Dec 9;11(12):e0164941. doi: 10.1371/journal.pone.0164941 (PMC5147780; doi:10.1371/journal.pone.0164941)
Supplement: S9 Table — (XLSX) [file pone.0164941.s009.xlsx]

## Sheet: 工作表1
	Control		OGD
	Mean	SD	Mean	SD
Lenti vector	1	0.05	2.45	0.23
Lenti-BDNF-AS	0.89	0.12	1.42	0.12
Lenti-shBDNF-AS	1.23	0.24	4.56	0.24
