# Supplementary material for: Inhibition of BDNF-AS Provides Neuroprotection for Retinal Ganglion Cells against Ischemic Injury
Source: PLoS One. 2016 Dec 9;11(12):e0164941. doi: 10.1371/journal.pone.0164941 (PMC5147780; doi:10.1371/journal.pone.0164941)
Supplement: S15 Table — (XLSX) [file pone.0164941.s015.xlsx]

## Sheet: 工作表1
	Control		OGD
	Mean	SD	Mean	SD
Lenti vector	1	0.11	1.68	0.15
Lenti-BDNF-AS	1.43	0.12	2.13	0.23
Lenti-shBDNF-AS	0.79	0.09	0.89	0.13
